# Supplementary material
Source: publisher figshare collection journal article supplement (https://acs.figshare.com/ndownloader/files/4557469)
Supplement: Supplementary file 1 [file 4557469]

 
data_155rich 
 
_audit_creation_method            SHELXL-97 
_chemical_name_systematic 
; 
 ? 
; 
_chemical_name_common             ? 
_chemical_melting_point           ? 
_chemical_formula_moiety          ? 
_chemical_formula_sum 
 'C44 H48 Au2 N2 P2 Se2' 
_chemical_formula_weight          1218.64 
 
loop_ 
 _atom_type_symbol 
 _atom_type_description 
 _atom_type_scat_dispersion_real 
 _atom_type_scat_dispersion_imag 
 _atom_type_scat_source 
 'C'  'C'   0.0033   0.0016 
 'International Tables Vol C Tables 4.2.6.8 and 6.1.1.4' 
 'H'  'H'   0.0000   0.0000 
 'International Tables Vol C Tables 4.2.6.8 and 6.1.1.4' 
 'N'  'N'   0.0061   0.0033 
 'International Tables Vol C Tables 4.2.6.8 and 6.1.1.4' 
 'P'  'P'   0.1023   0.0942 
 'International Tables Vol C Tables 4.2.6.8 and 6.1.1.4' 
 'Se'  'Se'  -0.0929   2.2259 
 'International Tables Vol C Tables 4.2.6.8 and 6.1.1.4' 
 'Au'  'Au'  -2.0133   8.8022 
 'International Tables Vol C Tables 4.2.6.8 and 6.1.1.4' 
 
_symmetry_cell_setting           'Monoclinic'
_symmetry_space_group_name_H-M   'C2/c  '
 
loop_ 
 _symmetry_equiv_pos_as_xyz 
 'x, y, z' 
 '-x, y, -z+1/2' 
 'x+1/2, y+1/2, z' 
 '-x+1/2, y+1/2, -z+1/2' 
 '-x, -y, -z' 
 'x, -y, z-1/2' 
 '-x+1/2, -y+1/2, -z' 
 'x+1/2, -y+1/2, z-1/2' 
 
_cell_length_a                    24.963(2) 
_cell_length_b                    10.7223(9) 
_cell_length_c                    16.3611(14) 
_cell_angle_alpha                 90.00 
_cell_angle_beta                  95.532(2) 
_cell_angle_gamma                 90.00 
_cell_volume                      4358.8(6) 
_cell_formula_units_Z             4 
_cell_measurement_temperature     297(2) 
_cell_measurement_reflns_used    5863
_cell_measurement_theta_min        2.38
_cell_measurement_theta_max       23.50
 
_exptl_crystal_description       'block'
_exptl_crystal_colour            'yellow'
_exptl_crystal_size_max           0.41 
_exptl_crystal_size_mid           0.19 
_exptl_crystal_size_min           0.11 
_exptl_crystal_density_meas       ? 
_exptl_crystal_density_diffrn     1.857 
_exptl_crystal_density_method     'not measured' 
_exptl_crystal_F_000              2328 
_exptl_absorpt_coefficient_mu     8.499 
_exptl_absorpt_correction_type    'multi-scan' 
_exptl_absorpt_correction_T_min   0.1107 
_exptl_absorpt_correction_T_max   0.3926 
_exptl_absorpt_process_details    'Bruker 2001.'
 
_exptl_special_details 
; 
 ? 
; 
 
_diffrn_ambient_temperature       297(2) 
_diffrn_radiation_wavelength      0.71073 
_diffrn_radiation_type            MoK\a 
_diffrn_radiation_source          'fine-focus sealed tube' 
_diffrn_radiation_monochromator   graphite 
_diffrn_measurement_device_type  'CCD area detector'
_diffrn_measurement_method       'phi and omega scans'
_diffrn_detector_area_resol_mean  ? 
_diffrn_standards_number          ? 
_diffrn_standards_interval_count  ? 
_diffrn_standards_interval_time   ? 
_diffrn_standards_decay_%         ? 
_diffrn_reflns_number             22845 
_diffrn_reflns_av_R_equivalents   0.0545 
_diffrn_reflns_av_sigmaI/netI     0.0410 
_diffrn_reflns_limit_h_min        -31 
_diffrn_reflns_limit_h_max        31 
_diffrn_reflns_limit_k_min        -13 
_diffrn_reflns_limit_k_max        13 
_diffrn_reflns_limit_l_min        -20 
_diffrn_reflns_limit_l_max        20 
_diffrn_reflns_theta_min          1.64 
_diffrn_reflns_theta_max          26.37 
_reflns_number_total              4459 
_reflns_number_gt                 4076 
_reflns_threshold_expression      >2sigma(I) 
 
_computing_data_collection      'Bruker SMART'
_computing_cell_refinement      'Bruker SMART'
_computing_data_reduction       'Bruker SAINT'
_computing_structure_solution   'Bruker SHELXTL'
_computing_structure_refinement 'Bruker SHELXTL'
_computing_molecular_graphics   'Bruker SHELXTL'
_computing_publication_material 'Bruker SHELXTL'
 
_refine_special_details 
; 
 Refinement of F^2^ against ALL reflections.  The weighted R-factor wR and 
 goodness of fit S are based on F^2^, conventional R-factors R are based 
 on F, with F set to zero for negative F^2^. The threshold expression of 
 F^2^ > 2sigma(F^2^) is used only for calculating R-factors(gt) etc. and is 
 not relevant to the choice of reflections for refinement.  R-factors based 
 on F^2^ are statistically about twice as large as those based on F, and R- 
 factors based on ALL data will be even larger. 
; 
 
_refine_ls_structure_factor_coef  Fsqd  
_refine_ls_matrix_type            full 
_refine_ls_weighting_scheme       calc  
_refine_ls_weighting_details 
 'calc w=1/[\s^2^(Fo^2^)+(0.0302P)^2^+25.1623P] where P=(Fo^2^+2Fc^2^)/3' 
_atom_sites_solution_primary      direct 
_atom_sites_solution_secondary    difmap 
_atom_sites_solution_hydrogens    geom 
_refine_ls_hydrogen_treatment     rigid 
_refine_ls_extinction_method      none 
_refine_ls_extinction_coef        ? 
_refine_ls_number_reflns          4459 
_refine_ls_number_parameters      237 
_refine_ls_number_restraints      0 
_refine_ls_R_factor_all           0.0565 
_refine_ls_R_factor_gt            0.0503 
_refine_ls_wR_factor_ref          0.1041 
_refine_ls_wR_factor_gt           0.1013 
_refine_ls_goodness_of_fit_ref    1.234 
_refine_ls_restrained_S_all       1.234 
_refine_ls_shift/su_max           0.002 
_refine_ls_shift/su_mean          0.000 
 
loop_ 
 _atom_site_label 
 _atom_site_type_symbol 
 _atom_site_fract_x 
 _atom_site_fract_y 
 _atom_site_fract_z 
 _atom_site_U_iso_or_equiv 
 _atom_site_adp_type 
 _atom_site_occupancy 
 _atom_site_symmetry_multiplicity 
 _atom_site_calc_flag 
 _atom_site_refinement_flags 
 _atom_site_disorder_assembly 
 _atom_site_disorder_group 
Au1 Au 0.996536(11) 0.70775(3) 0.343804(18) 0.04610(12) Uani 1 1 d . . . 
C1 C 0.9020(4) 0.8906(8) 0.4041(6) 0.067(2) Uani 1 1 d . . . 
C2 C 0.8522(4) 0.8344(9) 0.4090(6) 0.069(2) Uani 1 1 d . . . 
C3 C 0.8278(4) 0.8445(9) 0.4818(7) 0.075(3) Uani 1 1 d . . . 
H3 H 0.7947 0.8062 0.4854 0.090 Uiso 1 1 calc R . . 
C4 C 0.8507(6) 0.9082(10) 0.5471(7) 0.086(3) Uani 1 1 d . . . 
H4 H 0.8334 0.9140 0.5948 0.104 Uiso 1 1 calc R . . 
C5 C 0.8995(6) 0.9639(10) 0.5425(8) 0.102(4) Uani 1 1 d . . . 
H5 H 0.9159 1.0071 0.5874 0.122 Uiso 1 1 calc R . . 
C6 C 0.9242(4) 0.9559(10) 0.4713(8) 0.085(3) Uani 1 1 d . . . 
H6 H 0.9570 0.9959 0.4685 0.102 Uiso 1 1 calc R . . 
C7 C 0.8262(5) 0.7593(12) 0.3375(8) 0.100(4) Uani 1 1 d . . . 
H7A H 0.8313 0.8034 0.2871 0.120 Uiso 1 1 calc R . . 
H7B H 0.8450 0.6802 0.3358 0.120 Uiso 1 1 calc R . . 
C8 C 0.7375(7) 0.8446(15) 0.3216(9) 0.139(6) Uani 1 1 d . . . 
H8A H 0.7405 0.8706 0.2661 0.209 Uiso 1 1 calc R . . 
H8B H 0.7498 0.9103 0.3586 0.209 Uiso 1 1 calc R . . 
H8C H 0.7006 0.8259 0.3284 0.209 Uiso 1 1 calc R . . 
C9 C 0.7522(6) 0.6388(14) 0.2779(9) 0.129(5) Uani 1 1 d . . . 
H9A H 0.7720 0.5631 0.2900 0.194 Uiso 1 1 calc R . . 
H9B H 0.7587 0.6676 0.2241 0.194 Uiso 1 1 calc R . . 
H9C H 0.7145 0.6233 0.2795 0.194 Uiso 1 1 calc R . . 
C10 C 1.0634(3) 0.4267(6) 0.3199(4) 0.0429(16) Uani 1 1 d . . . 
C11 C 1.0880(3) 0.4686(8) 0.2534(5) 0.0540(19) Uani 1 1 d . . . 
H11 H 1.0942 0.5534 0.2474 0.065 Uiso 1 1 calc R . . 
C12 C 1.1035(4) 0.3856(9) 0.1951(5) 0.065(2) Uani 1 1 d . . . 
H12 H 1.1204 0.4147 0.1506 0.078 Uiso 1 1 calc R . . 
C13 C 1.0941(4) 0.2614(9) 0.2032(6) 0.070(3) Uani 1 1 d . . . 
H13 H 1.1039 0.2058 0.1637 0.085 Uiso 1 1 calc R . . 
C14 C 1.0703(5) 0.2188(8) 0.2693(6) 0.079(3) Uani 1 1 d . . . 
H14 H 1.0643 0.1338 0.2750 0.095 Uiso 1 1 calc R . . 
C15 C 1.0551(4) 0.3011(7) 0.3279(5) 0.062(2) Uani 1 1 d . . . 
H15 H 1.0391 0.2710 0.3730 0.075 Uiso 1 1 calc R . . 
C16 C 1.1084(3) 0.5813(7) 0.4505(4) 0.0444(16) Uani 1 1 d . . . 
C17 C 1.1453(3) 0.4897(9) 0.4774(5) 0.063(2) Uani 1 1 d . . . 
H17 H 1.1378 0.4065 0.4650 0.075 Uiso 1 1 calc R . . 
C18 C 1.1929(4) 0.5209(11) 0.5221(6) 0.076(3) Uani 1 1 d . . . 
H18 H 1.2175 0.4588 0.5391 0.092 Uiso 1 1 calc R . . 
C19 C 1.2042(4) 0.6423(12) 0.5416(6) 0.078(3) Uani 1 1 d . . . 
H19 H 1.2363 0.6624 0.5724 0.094 Uiso 1 1 calc R . . 
C20 C 1.1692(4) 0.7331(10) 0.5166(6) 0.073(3) Uani 1 1 d . . . 
H20 H 1.1772 0.8156 0.5304 0.088 Uiso 1 1 calc R . . 
C21 C 1.1214(4) 0.7048(8) 0.4703(6) 0.063(2) Uani 1 1 d . . . 
H21 H 1.0978 0.7684 0.4524 0.075 Uiso 1 1 calc R . . 
C22 C 1.0091(3) 0.4572(6) 0.4672(4) 0.0365(14) Uani 1 1 d . . . 
H22A H 0.9780 0.4167 0.4388 0.044 Uiso 1 1 calc R . . 
H22B H 1.0323 0.3929 0.4930 0.044 Uiso 1 1 calc R . . 
N1 N 0.7700(4) 0.7347(10) 0.3392(6) 0.095(3) Uani 1 1 d . . . 
P1 P 1.04528(7) 0.54161(16) 0.39323(11) 0.0394(4) Uani 1 1 d . . . 
Se1 Se 0.93979(4) 0.88380(10) 0.30640(7) 0.0873(4) Uani 1 1 d . . . 
 
loop_ 
 _atom_site_aniso_label 
 _atom_site_aniso_U_11 
 _atom_site_aniso_U_22 
 _atom_site_aniso_U_33 
 _atom_site_aniso_U_23 
 _atom_site_aniso_U_13 
 _atom_site_aniso_U_12 
Au1 0.04684(19) 0.03797(17) 0.05377(19) 0.00778(12) 0.00629(12) 0.00845(12) 
C1 0.067(6) 0.047(5) 0.089(7) 0.007(5) 0.013(5) 0.018(4) 
C2 0.066(6) 0.056(5) 0.088(7) -0.003(5) 0.016(5) 0.011(4) 
C3 0.069(6) 0.063(6) 0.095(7) -0.003(5) 0.023(6) 0.010(5) 
C4 0.116(10) 0.070(7) 0.074(7) -0.002(5) 0.014(7) 0.023(7) 
C5 0.138(12) 0.060(7) 0.100(9) -0.008(6) -0.025(9) 0.015(7) 
C6 0.066(7) 0.070(7) 0.117(9) 0.015(7) 0.000(6) 0.012(5) 
C7 0.098(9) 0.095(8) 0.110(9) -0.026(7) 0.028(7) -0.004(7) 
C8 0.155(14) 0.125(12) 0.133(12) 0.018(10) -0.015(11) 0.045(11) 
C9 0.141(13) 0.121(12) 0.121(11) -0.015(9) -0.015(9) -0.016(10) 
C10 0.046(4) 0.041(4) 0.041(4) -0.002(3) 0.002(3) 0.013(3) 
C11 0.051(5) 0.057(5) 0.055(5) 0.004(4) 0.011(4) 0.010(4) 
C12 0.060(5) 0.087(7) 0.049(5) -0.001(4) 0.013(4) 0.017(5) 
C13 0.091(7) 0.068(6) 0.052(5) -0.020(4) 0.005(5) 0.019(5) 
C14 0.121(9) 0.043(5) 0.073(6) -0.010(4) 0.008(6) 0.010(5) 
C15 0.097(7) 0.045(4) 0.046(4) -0.009(4) 0.012(4) 0.004(4) 
C16 0.043(4) 0.045(4) 0.047(4) 0.002(3) 0.012(3) 0.001(3) 
C17 0.054(5) 0.065(5) 0.067(5) -0.005(4) -0.001(4) 0.012(4) 
C18 0.052(6) 0.097(8) 0.079(6) -0.003(6) 0.002(5) 0.016(5) 
C19 0.043(5) 0.118(9) 0.073(6) 0.003(6) 0.000(4) -0.015(6) 
C20 0.066(6) 0.075(6) 0.079(6) 0.003(5) 0.006(5) -0.030(5) 
C21 0.063(5) 0.053(5) 0.072(6) 0.004(4) 0.008(4) -0.013(4) 
C22 0.040(4) 0.030(3) 0.041(3) 0.005(3) 0.007(3) 0.004(3) 
N1 0.091(7) 0.091(7) 0.100(7) -0.005(6) -0.005(6) 0.003(6) 
P1 0.0414(10) 0.0351(9) 0.0423(9) 0.0027(7) 0.0073(7) 0.0050(7) 
Se1 0.0816(7) 0.0725(6) 0.1134(8) 0.0489(6) 0.0377(6) 0.0384(6) 
 
_geom_special_details 
; 
 All esds (except the esd in the dihedral angle between two l.s. planes) 
 are estimated using the full covariance matrix.  The cell esds are taken 
 into account individually in the estimation of esds in distances, angles 
 and torsion angles; correlations between esds in cell parameters are only 
 used when they are defined by crystal symmetry.  An approximate (isotropic) 
 treatment of cell esds is used for estimating esds involving l.s. planes. 
; 
 
loop_ 
 _geom_bond_atom_site_label_1 
 _geom_bond_atom_site_label_2 
 _geom_bond_distance 
 _geom_bond_site_symmetry_2 
 _geom_bond_publ_flag 
Au1 P1 2.2624(18) . ? 
Au1 Se1 2.4037(9) . ? 
Au1 Au1 3.0910(6) 2_755 ? 
C1 C6 1.375(14) . ? 
C1 C2 1.390(13) . ? 
C1 Se1 1.934(10) . ? 
C2 C3 1.394(13) . ? 
C2 C7 1.513(15) . ? 
C3 C4 1.348(14) . ? 
C4 C5 1.365(17) . ? 
C5 C6 1.372(16) . ? 
C7 N1 1.431(15) . ? 
C8 N1 1.444(16) . ? 
C9 N1 1.475(15) . ? 
C10 C15 1.371(10) . ? 
C10 C11 1.376(10) . ? 
C10 P1 1.807(7) . ? 
C11 C12 1.386(11) . ? 
C12 C13 1.360(13) . ? 
C13 C14 1.361(14) . ? 
C14 C15 1.384(12) . ? 
C16 C17 1.388(11) . ? 
C16 C21 1.394(11) . ? 
C16 P1 1.806(8) . ? 
C17 C18 1.375(12) . ? 
C18 C19 1.363(14) . ? 
C19 C20 1.345(14) . ? 
C20 C21 1.384(13) . ? 
C22 C22 1.514(12) 5_766 ? 
C22 P1 1.820(6) . ? 
 
loop_ 
 _geom_angle_atom_site_label_1 
 _geom_angle_atom_site_label_2 
 _geom_angle_atom_site_label_3 
 _geom_angle 
 _geom_angle_site_symmetry_1 
 _geom_angle_site_symmetry_3 
 _geom_angle_publ_flag 
P1 Au1 Se1 173.16(5) . . ? 
P1 Au1 Au1 105.98(5) . 2_755 ? 
Se1 Au1 Au1 80.51(3) . 2_755 ? 
C6 C1 C2 117.9(10) . . ? 
C6 C1 Se1 119.3(8) . . ? 
C2 C1 Se1 122.8(8) . . ? 
C1 C2 C3 118.8(10) . . ? 
C1 C2 C7 120.4(10) . . ? 
C3 C2 C7 120.8(10) . . ? 
C4 C3 C2 122.0(11) . . ? 
C3 C4 C5 119.4(11) . . ? 
C4 C5 C6 119.8(11) . . ? 
C5 C6 C1 122.1(11) . . ? 
N1 C7 C2 115.5(10) . . ? 
C15 C10 C11 118.7(7) . . ? 
C15 C10 P1 123.8(6) . . ? 
C11 C10 P1 117.5(6) . . ? 
C10 C11 C12 120.7(8) . . ? 
C13 C12 C11 119.9(8) . . ? 
C12 C13 C14 119.9(8) . . ? 
C13 C14 C15 120.5(9) . . ? 
C10 C15 C14 120.4(8) . . ? 
C17 C16 C21 117.8(8) . . ? 
C17 C16 P1 121.1(6) . . ? 
C21 C16 P1 121.1(6) . . ? 
C18 C17 C16 120.6(9) . . ? 
C19 C18 C17 120.4(9) . . ? 
C20 C19 C18 120.5(9) . . ? 
C19 C20 C21 120.5(10) . . ? 
C20 C21 C16 120.3(9) . . ? 
C22 C22 P1 111.8(6) 5_766 . ? 
C7 N1 C8 112.3(12) . . ? 
C7 N1 C9 110.2(11) . . ? 
C8 N1 C9 107.8(11) . . ? 
C16 P1 C10 104.1(3) . . ? 
C16 P1 C22 103.7(3) . . ? 
C10 P1 C22 105.9(3) . . ? 
C16 P1 Au1 114.4(2) . . ? 
C10 P1 Au1 117.4(2) . . ? 
C22 P1 Au1 110.2(2) . . ? 
C1 Se1 Au1 98.2(2) . . ? 
 
loop_ 
 _geom_torsion_atom_site_label_1 
 _geom_torsion_atom_site_label_2 
 _geom_torsion_atom_site_label_3 
 _geom_torsion_atom_site_label_4 
 _geom_torsion 
 _geom_torsion_site_symmetry_1 
 _geom_torsion_site_symmetry_2 
 _geom_torsion_site_symmetry_3 
 _geom_torsion_site_symmetry_4 
 _geom_torsion_publ_flag 
C6 C1 C2 C3 -1.3(13) . . . . ? 
Se1 C1 C2 C3 -179.7(7) . . . . ? 
C6 C1 C2 C7 -178.8(10) . . . . ? 
Se1 C1 C2 C7 2.7(13) . . . . ? 
C1 C2 C3 C4 0.7(14) . . . . ? 
C7 C2 C3 C4 178.3(11) . . . . ? 
C2 C3 C4 C5 -0.5(16) . . . . ? 
C3 C4 C5 C6 0.9(16) . . . . ? 
C4 C5 C6 C1 -1.5(16) . . . . ? 
C2 C1 C6 C5 1.7(14) . . . . ? 
Se1 C1 C6 C5 -179.8(8) . . . . ? 
C1 C2 C7 N1 -163.6(10) . . . . ? 
C3 C2 C7 N1 18.9(16) . . . . ? 
C15 C10 C11 C12 0.6(12) . . . . ? 
P1 C10 C11 C12 179.3(6) . . . . ? 
C10 C11 C12 C13 0.5(13) . . . . ? 
C11 C12 C13 C14 -1.2(15) . . . . ? 
C12 C13 C14 C15 0.8(16) . . . . ? 
C11 C10 C15 C14 -1.1(13) . . . . ? 
P1 C10 C15 C14 -179.7(8) . . . . ? 
C13 C14 C15 C10 0.4(16) . . . . ? 
C21 C16 C17 C18 0.1(12) . . . . ? 
P1 C16 C17 C18 -179.0(7) . . . . ? 
C16 C17 C18 C19 0.9(15) . . . . ? 
C17 C18 C19 C20 -0.8(16) . . . . ? 
C18 C19 C20 C21 -0.3(15) . . . . ? 
C19 C20 C21 C16 1.3(14) . . . . ? 
C17 C16 C21 C20 -1.1(12) . . . . ? 
P1 C16 C21 C20 177.9(7) . . . . ? 
C2 C7 N1 C8 72.4(15) . . . . ? 
C2 C7 N1 C9 -167.4(11) . . . . ? 
C17 C16 P1 C10 -43.8(7) . . . . ? 
C21 C16 P1 C10 137.2(7) . . . . ? 
C17 C16 P1 C22 66.8(7) . . . . ? 
C21 C16 P1 C22 -112.2(7) . . . . ? 
C17 C16 P1 Au1 -173.2(6) . . . . ? 
C21 C16 P1 Au1 7.8(7) . . . . ? 
C15 C10 P1 C16 102.9(7) . . . . ? 
C11 C10 P1 C16 -75.7(6) . . . . ? 
C15 C10 P1 C22 -6.1(8) . . . . ? 
C11 C10 P1 C22 175.3(6) . . . . ? 
C15 C10 P1 Au1 -129.6(7) . . . . ? 
C11 C10 P1 Au1 51.8(7) . . . . ? 
C22 C22 P1 C16 71.2(7) 5_766 . . . ? 
C22 C22 P1 C10 -179.6(6) 5_766 . . . ? 
C22 C22 P1 Au1 -51.7(7) 5_766 . . . ? 

Au1 Au1 P1 C16 108.1(3) 2_755 . . . ? 

Au1 Au1 P1 C10 -14.3(3) 2_755 . . . ? 

Au1 Au1 P1 C22 -135.6(2) 2_755 . . . ? 
C6 C1 Se1 Au1 86.3(7) . . . . ? 
C2 C1 Se1 Au1 -95.3(7) . . . . ? 

Au1 Au1 Se1 C1 160.9(3) 2_755 . . . ? 
 
_diffrn_measured_fraction_theta_max    1.000 
_diffrn_reflns_theta_full              26.37 
_diffrn_measured_fraction_theta_full   1.000 
_refine_diff_density_max    1.555 
_refine_diff_density_min   -1.499 
_refine_diff_density_rms    0.134 
